# Supplementary material
Source: publisher figshare collection journal article supplement (https://acs.figshare.com/ndownloader/files/4257814)
Supplement: Supplementary file 1 [file 4257814]

## **Supporting Information**

### **Pore with Gate - Enhancement of the Isosteric Heat of Adsorption of Dihydrogen *via* Post-synthetic Cation Exchange**

Sihai Yang,<sup>1</sup> Gregory S. B. Martin,<sup>1</sup> Jeremy J. Titman,<sup>1</sup> Alexander J. Blake,<sup>1</sup> David R. Allan,<sup>2</sup> Neil R.  
Champness<sup>1\*</sup> and Martin Schröder<sup>1\*</sup>

1. School of Chemistry, University of Nottingham, University Park, Nottingham NG7 2RD (UK)  
Fax: +44 115 951 3563 E-mail: Neil.Champness@nottingham.ac.uk; m.schroder@nottingham.ac.uk
2. Diamond Light Source, Harwell Science and Innovation Campus, Didcot, Oxfordshire, OX11 0DE (UK)

## 1. Experimental section

### 1.1 Materials and Measurements.

Analyses for C, H, and N were carried out on a CE-440 elemental analyzer. Thermogravimetric analyses (TGA) were performed under a N<sub>2</sub> atmosphere (100 ml/min) using a TA SDT-600 thermogravimetric analyzer with a heating rate of 2 °C/min. The *in-situ* IR spectra were recorded using a Bruker TENSER 27 FT-IR spectrophotometer in KBr mode under He flow with heating rate 20 °C/min. Analyses for Li and In were carried out using an ICP-MAS analyzer. Calibration curves for ICP-MAS were prepared by dilution of commercially available standards with the sample dissolved in concentrated HNO<sub>3</sub>, and diluted to an appropriate concentration for measurement. Powder X-ray diffraction (PXRD) data were collected over the 2 $\theta$  range 4-50° on a Bruker Advanced D8 diffractometer using Cu-K $\alpha$ 1 radiation ( $\lambda$  = 1.5406 Å, 40 kV/40mA).

### 1.2 <sup>7</sup>Li solid-state NMR measurements.

Table 1s. Isotropic shifts  $\delta$  (in ppm) and quadrupolar coupling constants C<sub>Q</sub> (in kHz) from solid-state <sup>7</sup>Li NMR spectroscopy.

| Sample        | $\delta(\text{Li})$ / ppm | C <sub>q</sub> ( <sup>7</sup> Li) / kHz |
|---------------|---------------------------|-----------------------------------------|
| NOTT-201-solv | -3.4(0.2)                 | 50(2)                                   |
| NOTT-201a     | -2.1(0.2)                 | 145(2)                                  |
| NOTT-207-solv | -3.6(0.2)                 | - <sup>a</sup>                          |
| NOTT-207a     | -2.6(0.2)                 | - <sup>a</sup>                          |
| NOTT-209-solv | -3.6(0.2)                 | 47(2)                                   |
| NOTT-209a     | -2.4(0.2)                 | 145(2)                                  |

<sup>a</sup> <sup>7</sup>Li satellite lines are not resolved from the central transition in this case.

## 2. Additional views of single crystal X-ray structures.

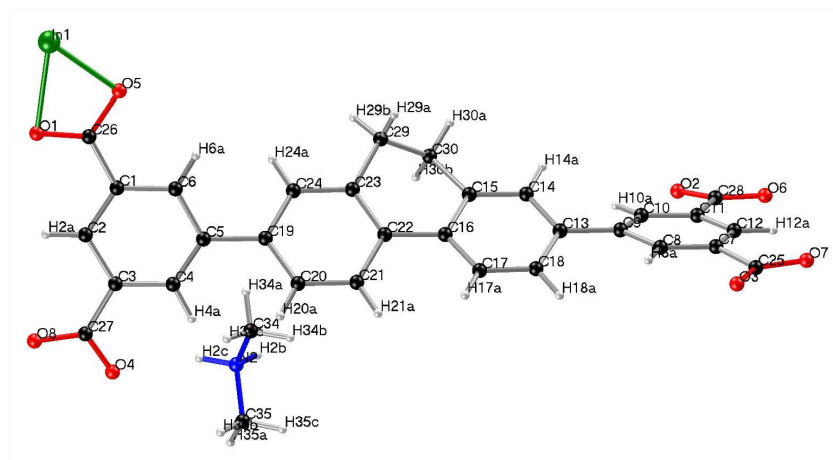

Figure 1s. View of the asymmetric units for NOTT-206-solv.

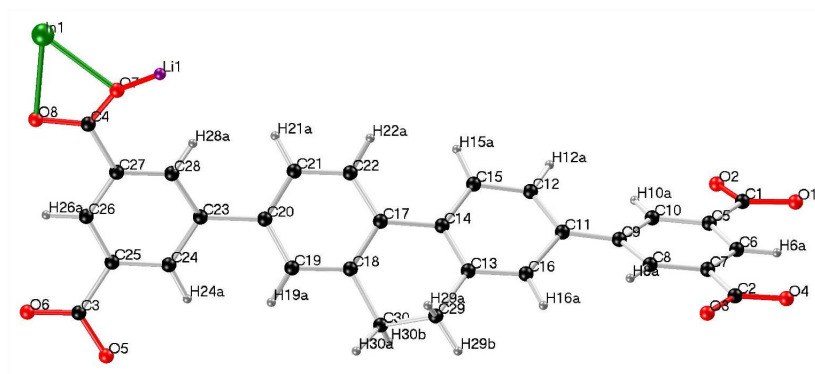

Figure 2s. View of the asymmetric units for NOTT-207-solv.

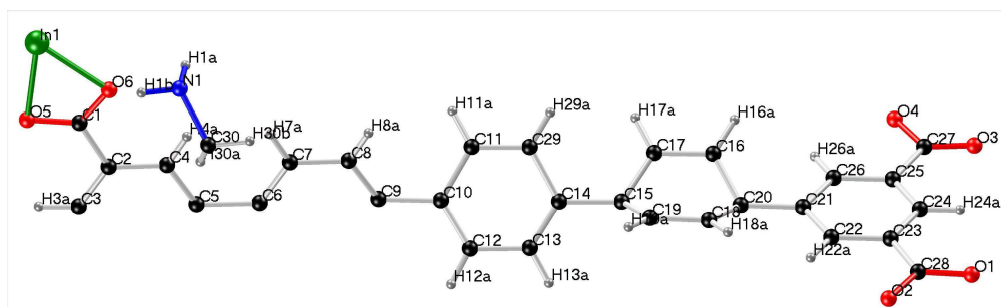

Figure 3s. View of the asymmetric units for NOTT-208-solv.

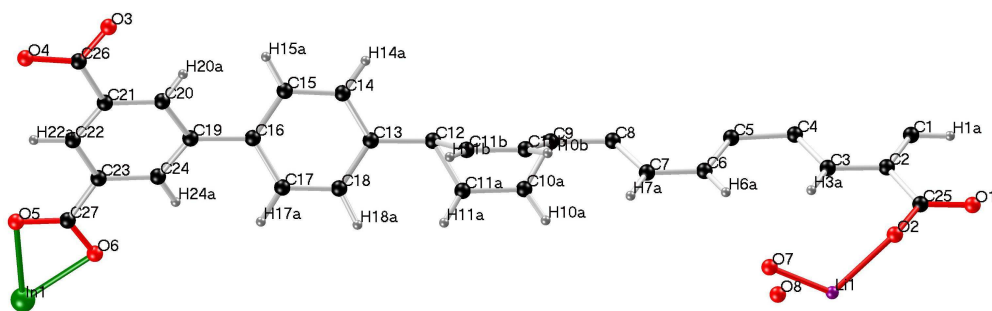

Figure 4s. View of the asymmetric units for NOTT-209-solv.

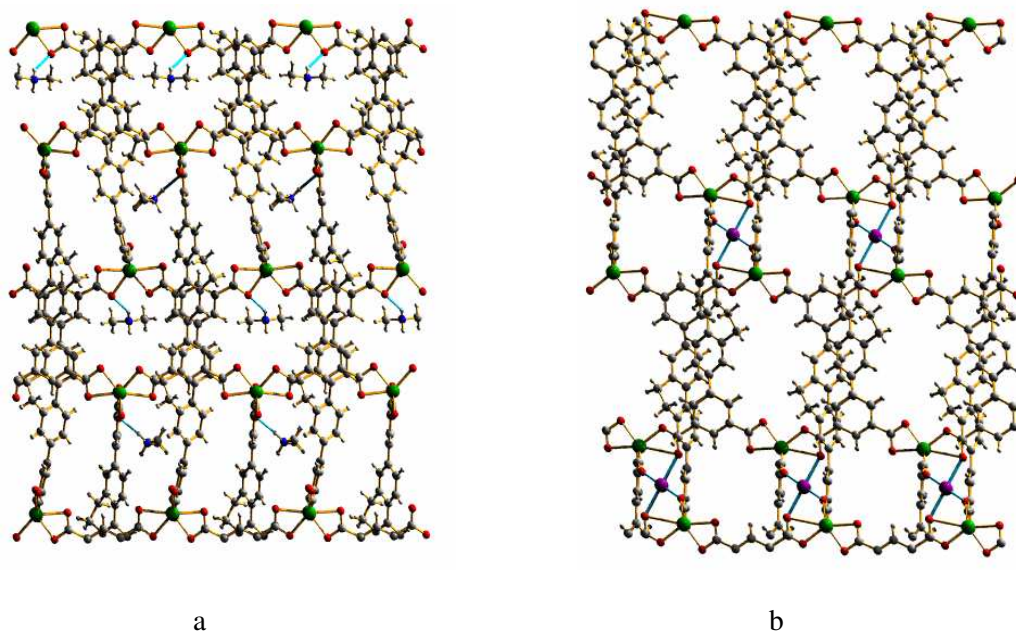

Figure 5s. View of the framework structures of (a) NOTT-206 and (b) NOTT-207 along the *b*-axis.

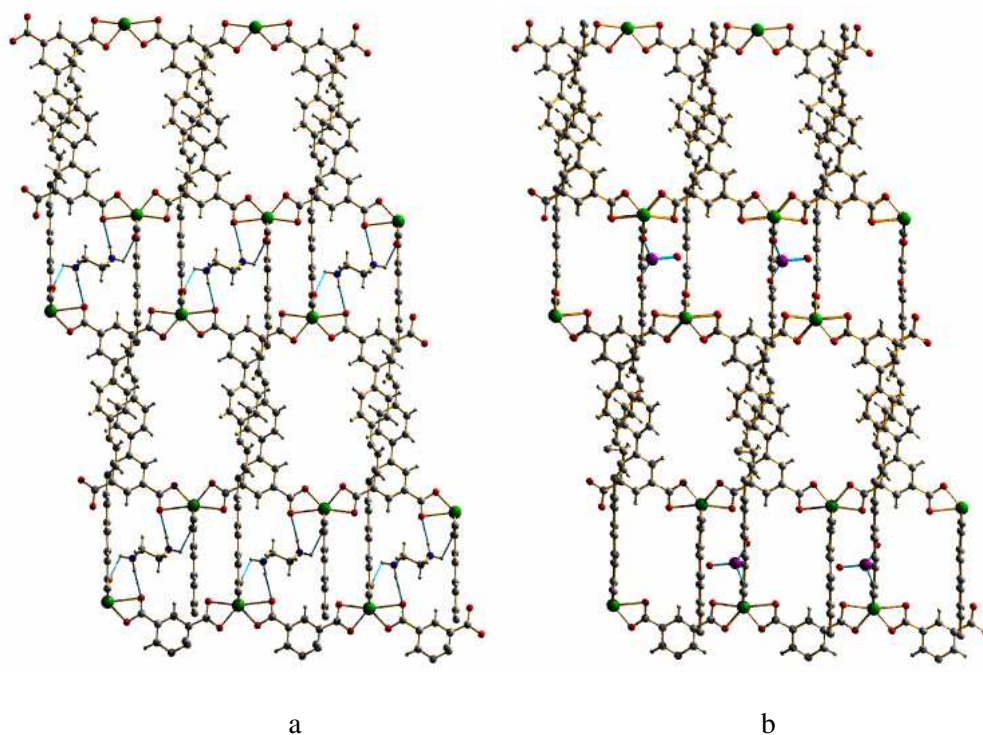

Figure 6s. Views of the framework structures of (a) NOTT-208 and (b) NOTT-209 along the  $b$ -axis.

### 3. TGA plots.

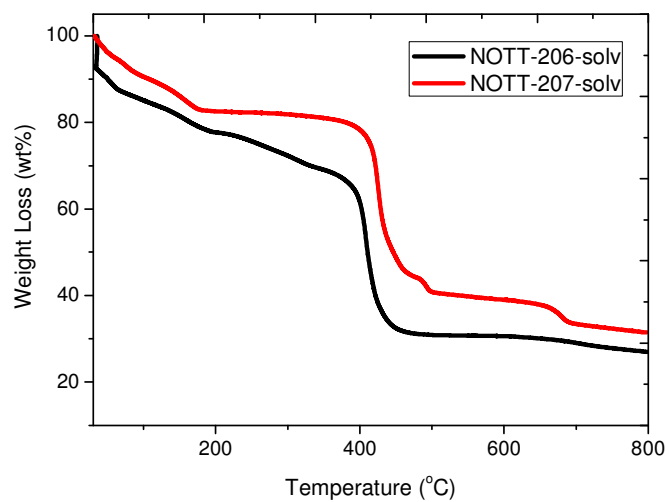

Figure 7s. TGA plots for NOTT-206-solv and NOTT-207-solv.

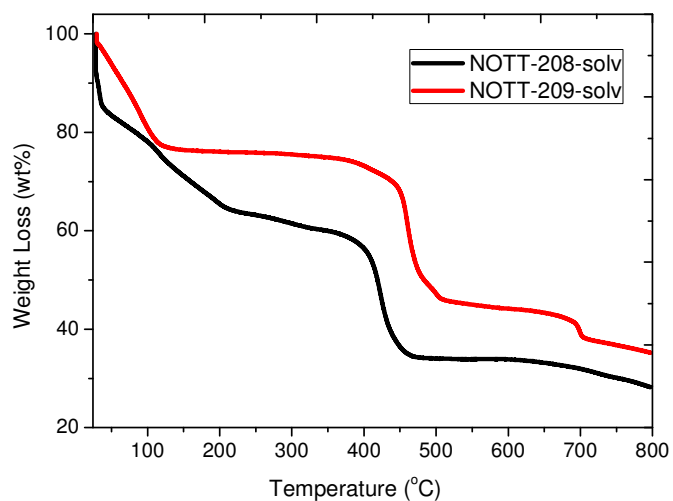

Figure 8s. TGA plots for NOTT-208-solv and NOTT-209-solv.

#### 4. Powder X-Ray diffraction.

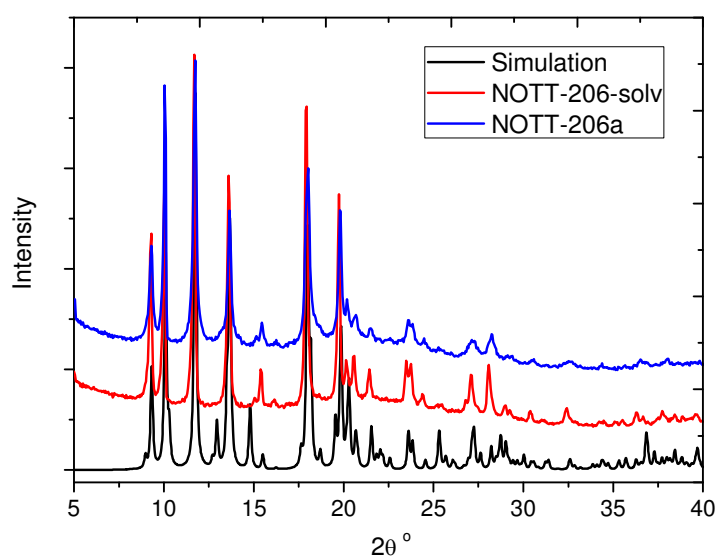

Figure 9s. Simulated and experimental PXRD patterns for NOTT-206-solv and NOTT-206a.

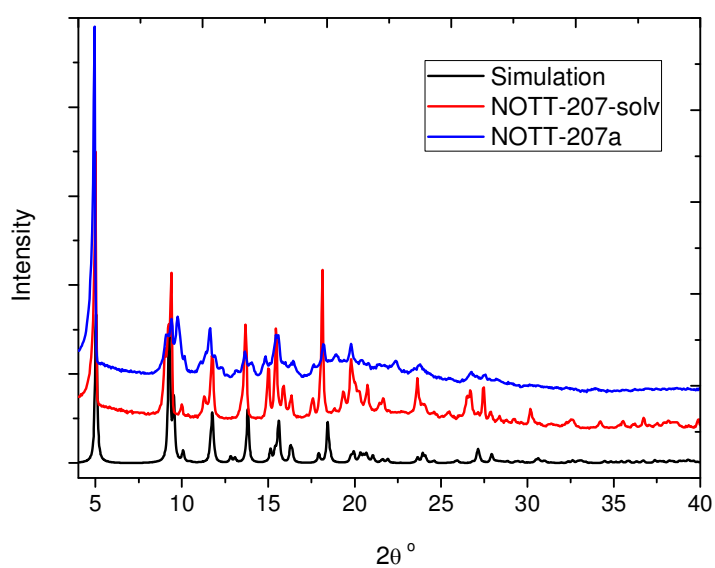

Figure 10s. Simulated and experimental PXRD patterns for NOTT-207-solv and NOTT-207a.

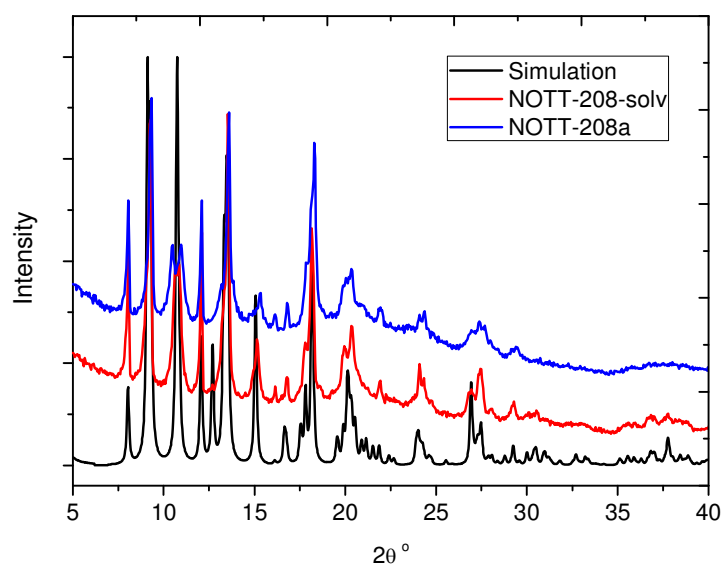

Figure 11s. Simulated and experimental PXRD patterns for NOTT-208-solv and NOTT-208a.

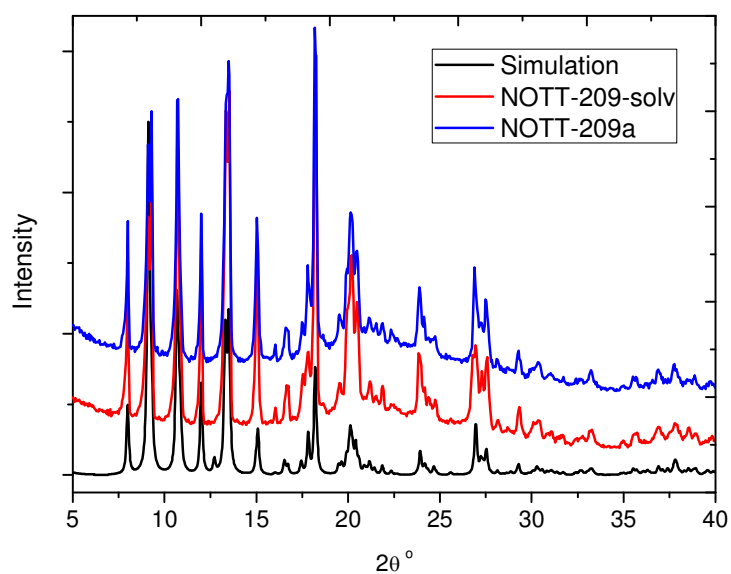

Figure 12s. Simulated and experimental PXRD patterns for NOTT-209-solv and NOTT-209a.

## 6. Additional gas adsorption isotherms.

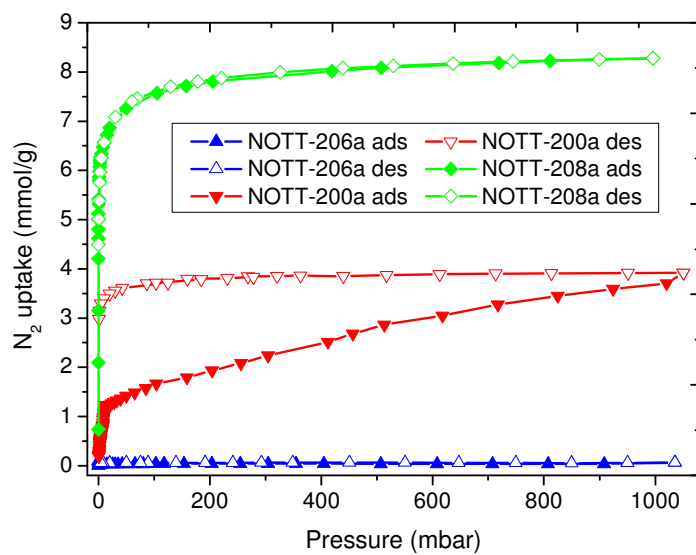

Figure 13s. N<sub>2</sub> sorption isotherms at 77 K for NOTT-206a, NOTT-200a and NOTT-208a.



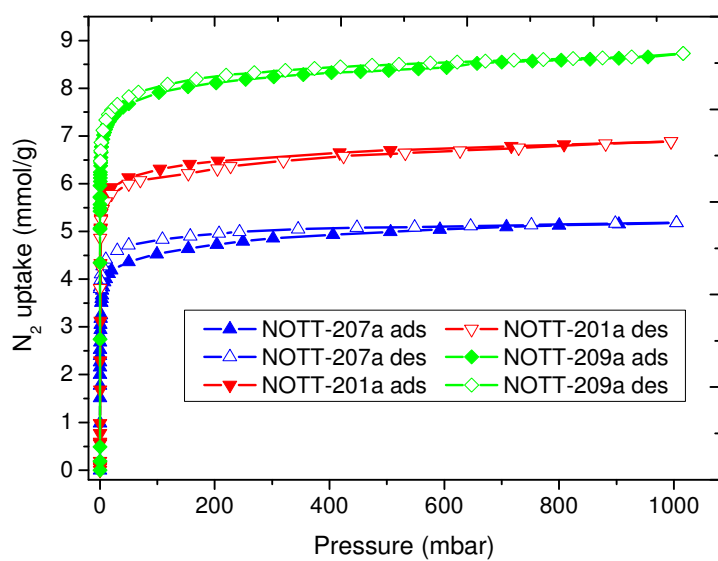

Figure 14s.  $N_2$  sorption isotherms at 77 K for NOTT-207a, NOTT-201a and NOTT-209a.

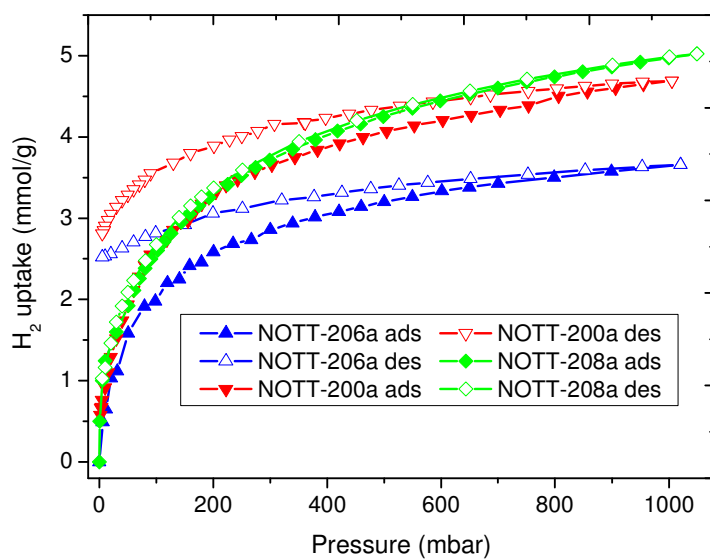

Figure 15s.  $H_2$  sorption isotherms at 77 K for NOTT-206a, NOTT-200a and NOTT-208a.

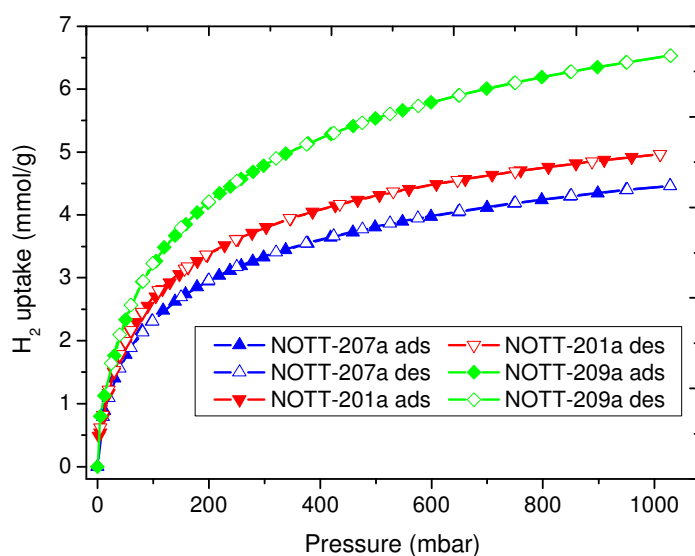

Figure 16s.  $H_2$  sorption isotherms at 77 K for NOTT-207a, NOTT-201a and NOTT-209a.

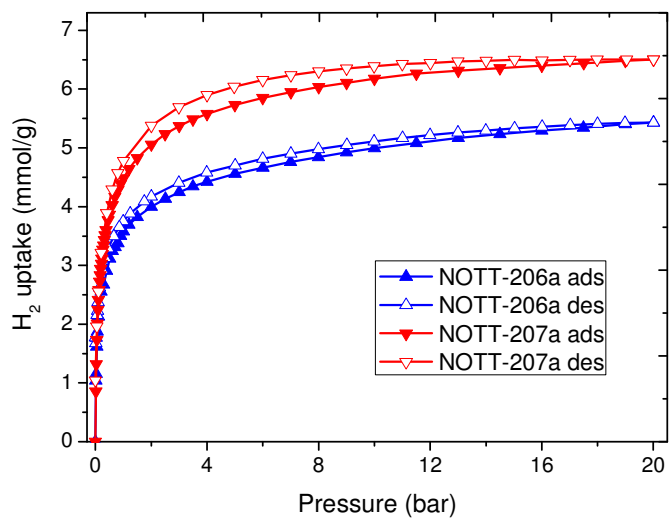

Figure 17s. High pressure (up to 20 bar)  $H_2$  sorption isotherms at 77 K for NOTT-206a and NOTT-207a.

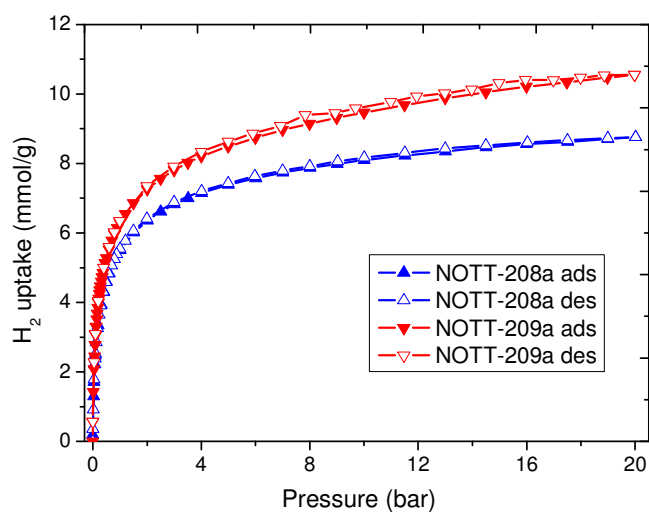

Figure 18s. High pressure (up to 20 bar)  $H_2$  sorption isotherms at 77 K for NOTT-208a and NOTT-209a.

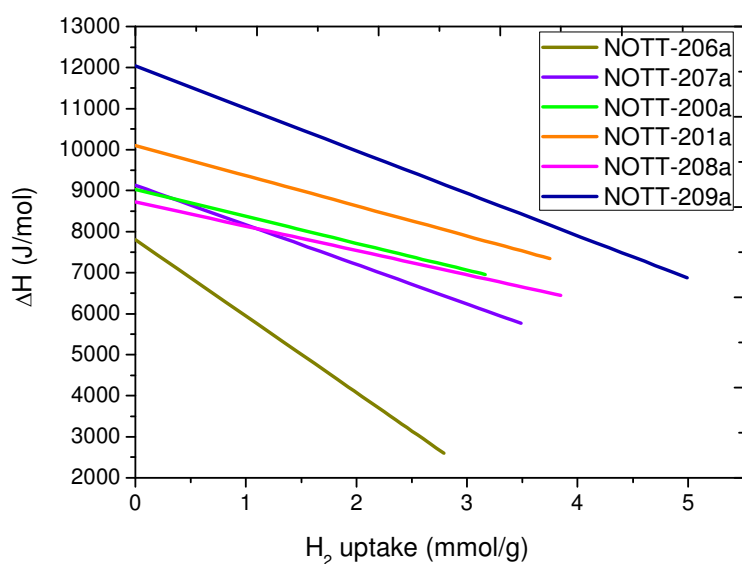

Figure 19s. Isosteric heats of adsorption of  $H_2$  in NOTT-206a, NOTT-207a, NOTT-200a, NOTT-201a, NOTT-208a and NOTT-209a.

## 7. Simulation of H<sub>2</sub> adsorption enthalpies.

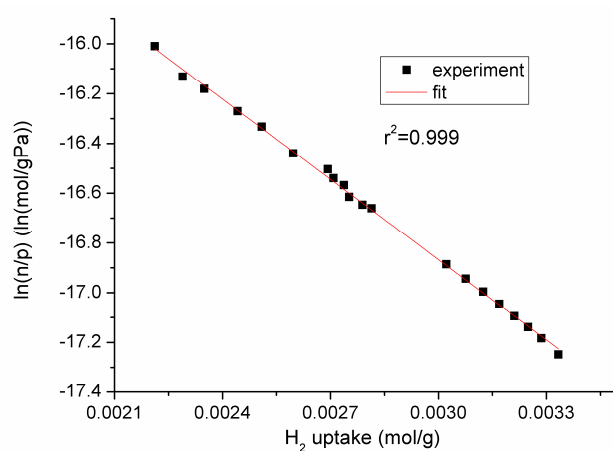

Figure 20s. Virial plot for the adsorption of H<sub>2</sub> on NOTT-206a at 77 K.

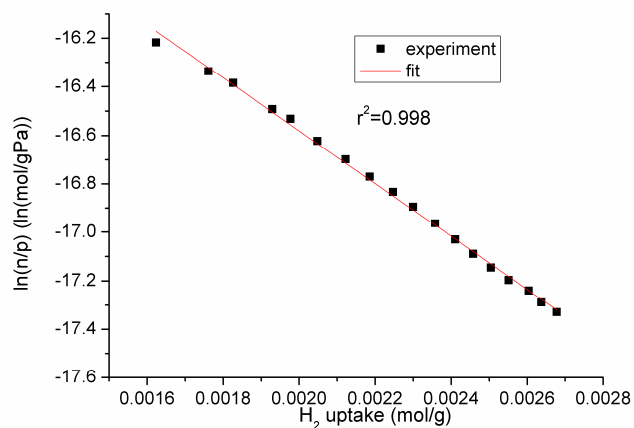

Figure 21s. Virial plot for the adsorption of H<sub>2</sub> on NOTT-206a at 87 K.

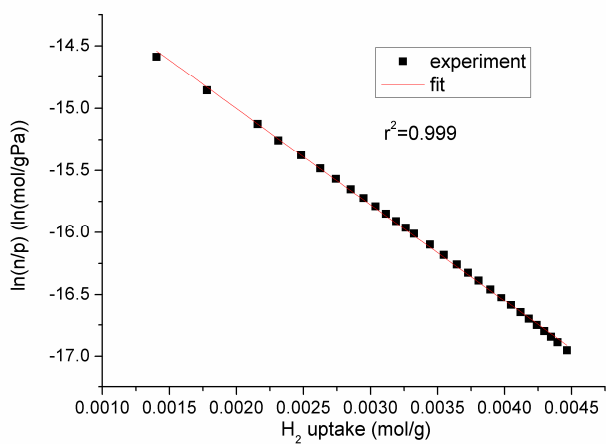

Figure 22s. Virial plot for the adsorption of H<sub>2</sub> on NOTT-207a at 77 K.

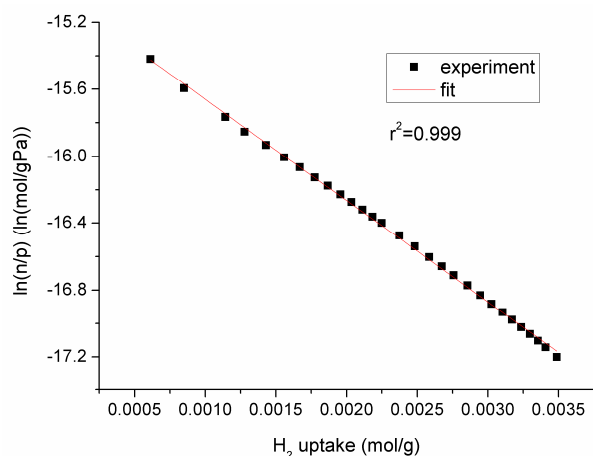

Figure 23s. Virial plot for the adsorption of  $H_2$  on NOTT-207a at 87 K.

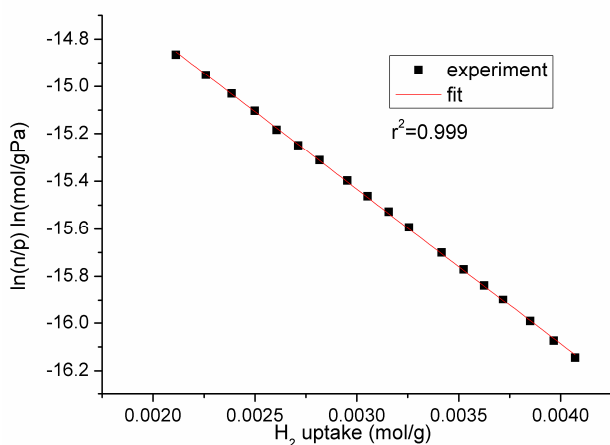

Figure 24s. Virial plot for the adsorption of  $H_2$  on NOTT-208a at 77 K.

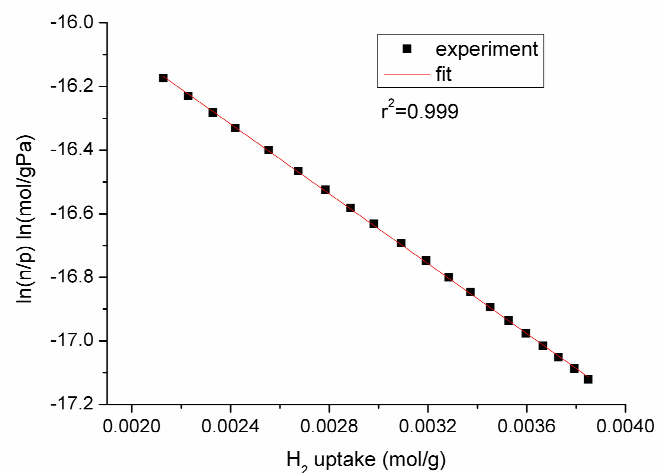

Figure 25s. Virial plot for the adsorption of  $H_2$  on NOTT-208a at 87 K.

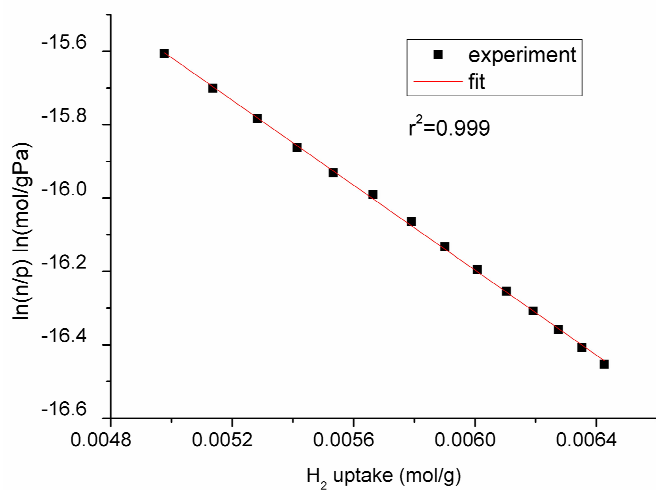

Figure 26s. Virial plot for the adsorption of  $H_2$  on NOTT-209a at 77 K.

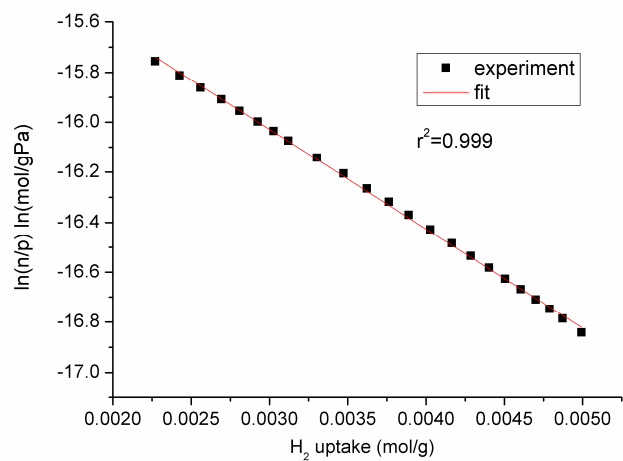

Figure 27s. Virial plot for the adsorption of  $H_2$  on NOTT-209a at 87 K.
